## **SUPPLEMENTARY FIGURES FOR:**

### **TEMPERATURE-DEPENDENT BEHAVIOURS ARE GENETICALLY VARIABLE IN THE NEMATODE *CAENORABDITIS BRIGGSAE***

#### **Authors**

Gregory W. Stegeman, Matthew Bueno de Mesquita, William S. Ryu, Asher D. Cutter

**Supplementary figure 1.** Cumulative distributions of isothermal track lengths. Plots are the same as Figure 1E in the main text, except each of three conditions are overlaid in each plot (three different colours, legend in figure) and data for different strains are in separate plots.

**Supplementary figure 2.** Total distributions of worm positions along gradient assay plates. A-E correspond to the same assay conditions as in Figure 2A-E in the main text respectively, as indicated by same symbols as in Figure 2. y-axis is proportion of animals in each of 11-bins, x-axis is position along gradient (0 is at centre, -1 corresponds to colder, +1 to warmer). Data for each strain coloured according to legend in figure. Number of animals per strain and condition range from 519 to 3788.

**Supplementary figure 3.** Distributions of isothermal tracking events along assay plates. These panels display the distributions of either approximate temperature (top and middle), or relative position from the centre of the assay plate (bottom – no gradient), for isothermal tracking events of all strains tested. Y-axis corresponds to proportion of animals across 11 bins, x-axis is approximate temperature of tracks. Data for each strain coloured according to legend in figure.

*C. elegans*:

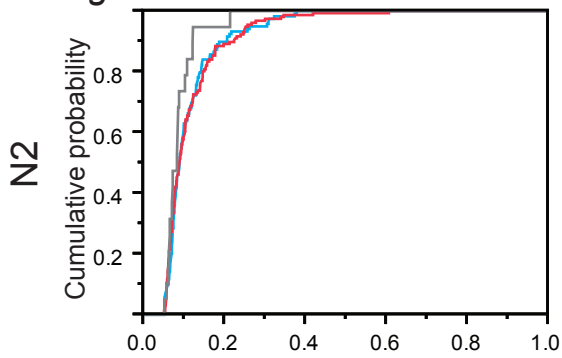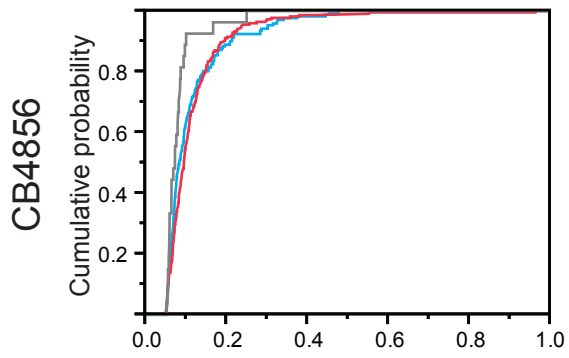

*C. briggsae*:

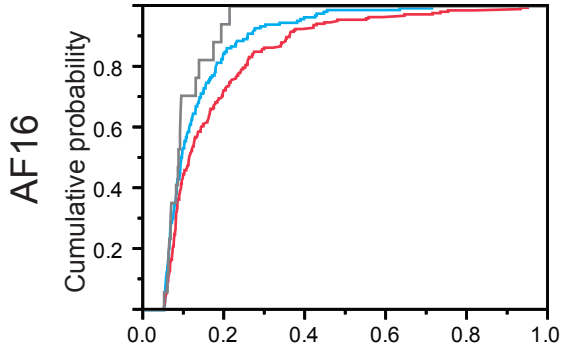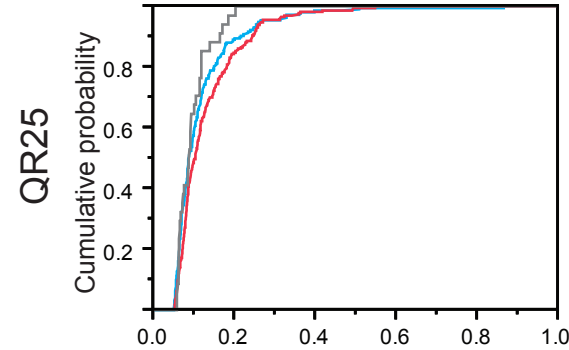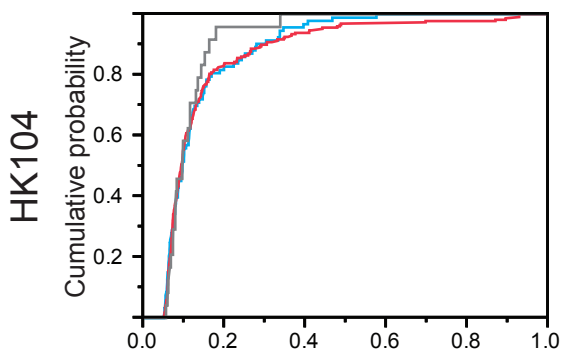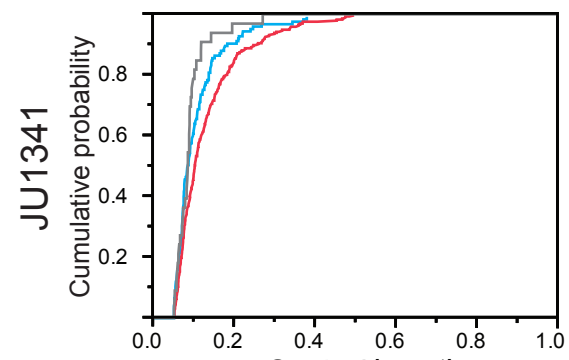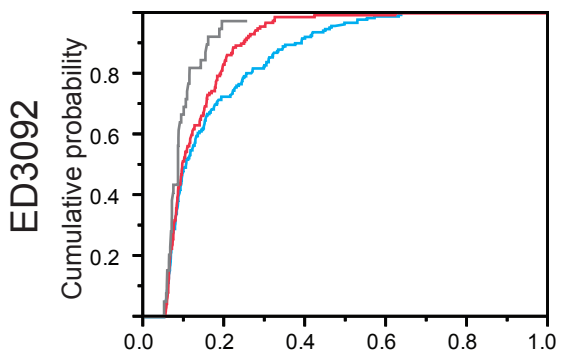

Raised at 17°C - Tested on gradient 13°C-21°C  
Raised at 23°C - Tested on gradient 19°C-23°C  
Raised at 23°C - Tested without thermal gradient

Supplementary figure 1.  
Cumulative distributions of  
isothermal track lengths

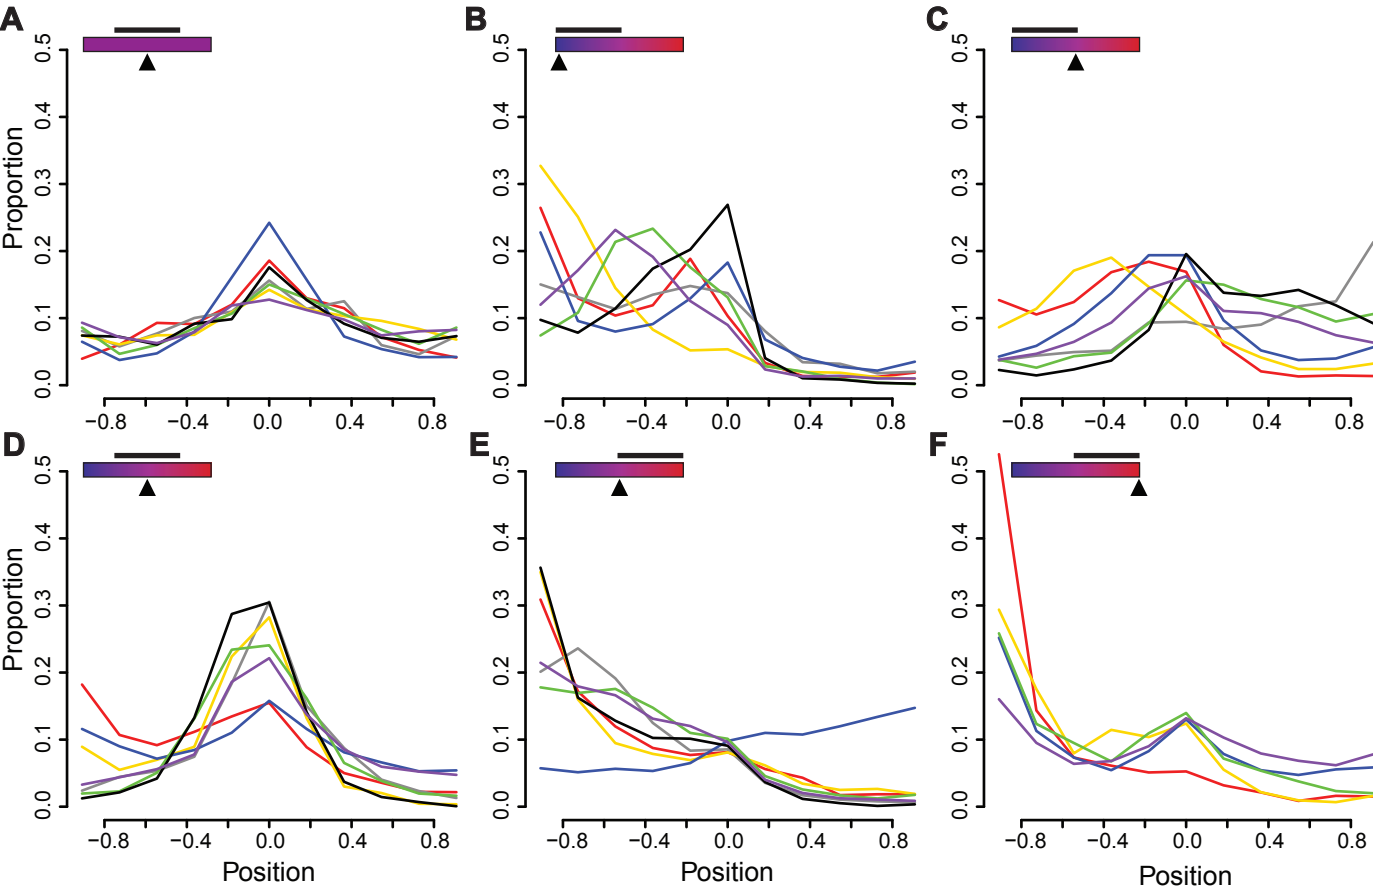

Supplementary Figure 2.

AF16  
ED3092  
HK104  
JU1341  
QR25  
N2  
CB4856

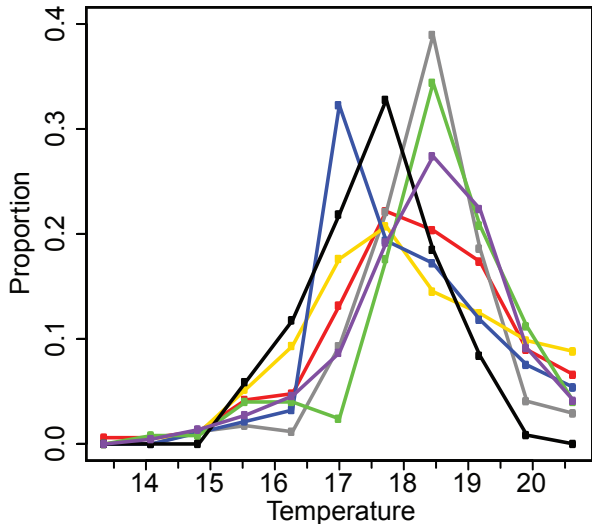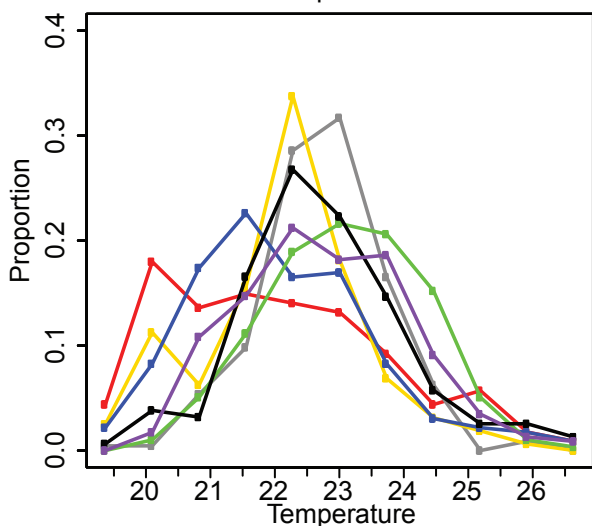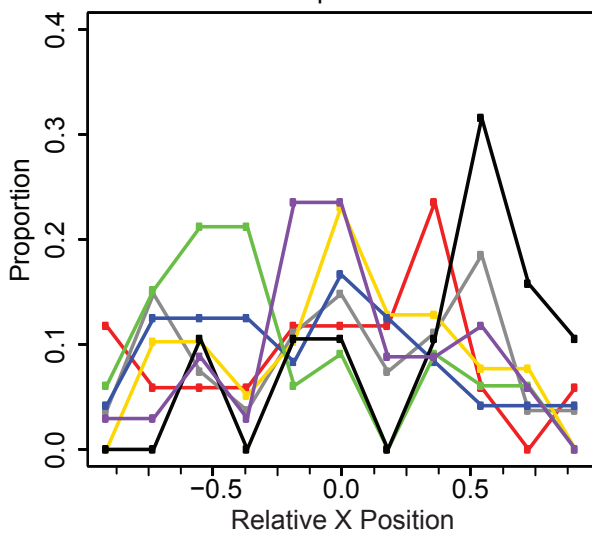

Raised at 17°C  
Tested on gradient from 13°C-21°C

Raised at 23°C  
Tested on gradient from 19°C-27°C

Raised at 23°C  
Tested with no gradient, at room temperature ~23°C

Supplementary figure 3.  
Distributions of isothermal tracking events along assay plate
